# Supplementary material
Source: PubMed Central journal article supplement (PMC2990129)
Supplement: supp_tpc.109.072827_Mouradov_Supplemental_Data_final.pdf [file supp_tpc.109.072827_Mouradov_Supplemental_Data_final.pdf]

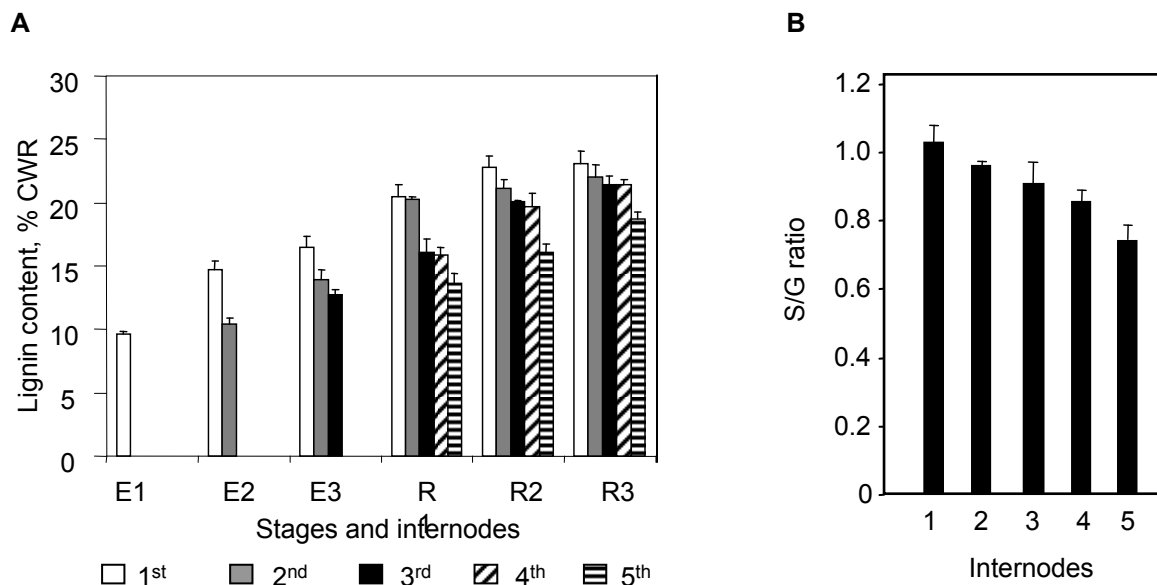

**Supplementary Figure 1.** Quantification of lignin content and composition in perennial ryegrass stems

**(A)** Acetyl bromide soluble lignin content in developing stems. The error bars are based on two biological and three technical replicates. Developmental stages as for Figure 1. Internodes were analysed separately and at each stage, results from the basal internode are shown on the left-hand column and those from the apical internode in the right-hand column. Results from the remaining internodes are shown in the other columns. CWR: cell wall residues.

**(B)** Syringyl: Guaiacyl (S/G) monolignol ratio measured in different internodes of stems at the R3 stage. Internodes were numbered from the base to the apex of the stem.

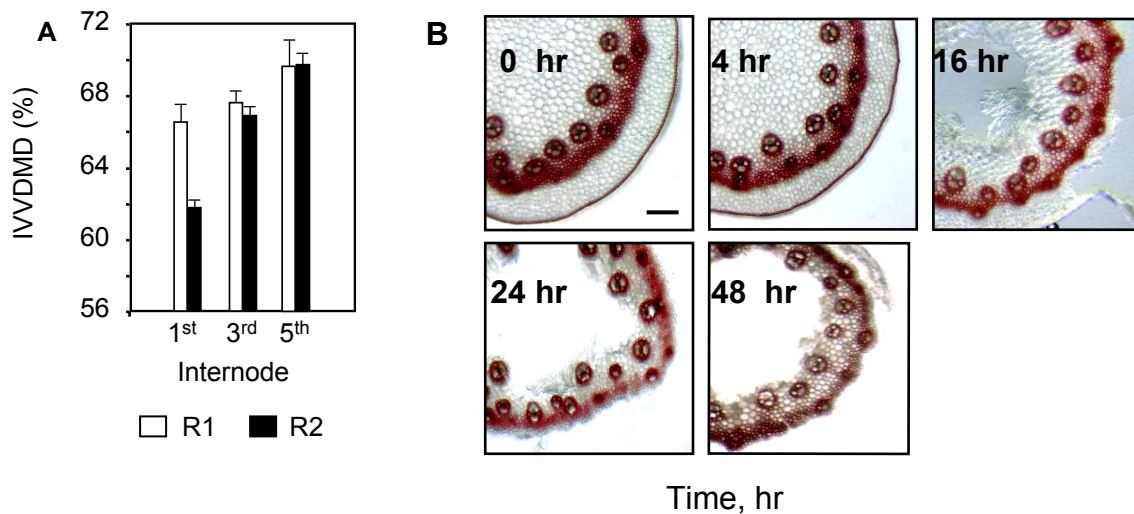

**Supplementary Figure 2.** Assessment of the digestibility of perennial ryegrass stems

**(A)** Estimation of *in vivo* dry matter digestibility (IVVDMD) of 1st, 3rd and 5th internodes of stems at the R1 and R2 stages, measured using near-infrared spectroscopy (NIRS). IVVDMD is a regression of the pepsin-cellulose digestibility compared to *in vivo* digestibility of known standards of similar class. white bars: R1 stage, black bars: R2 stage.

**(B)** Mäule staining of sections taken from the 1st internode of stems at the E3 stage incubated *in vitro* with bovine rumen fluid over a 48 h time course. Each micrograph is representative of at least 4 stems from different plants. Bars = 160  $\mu\text{m}$  for all sections

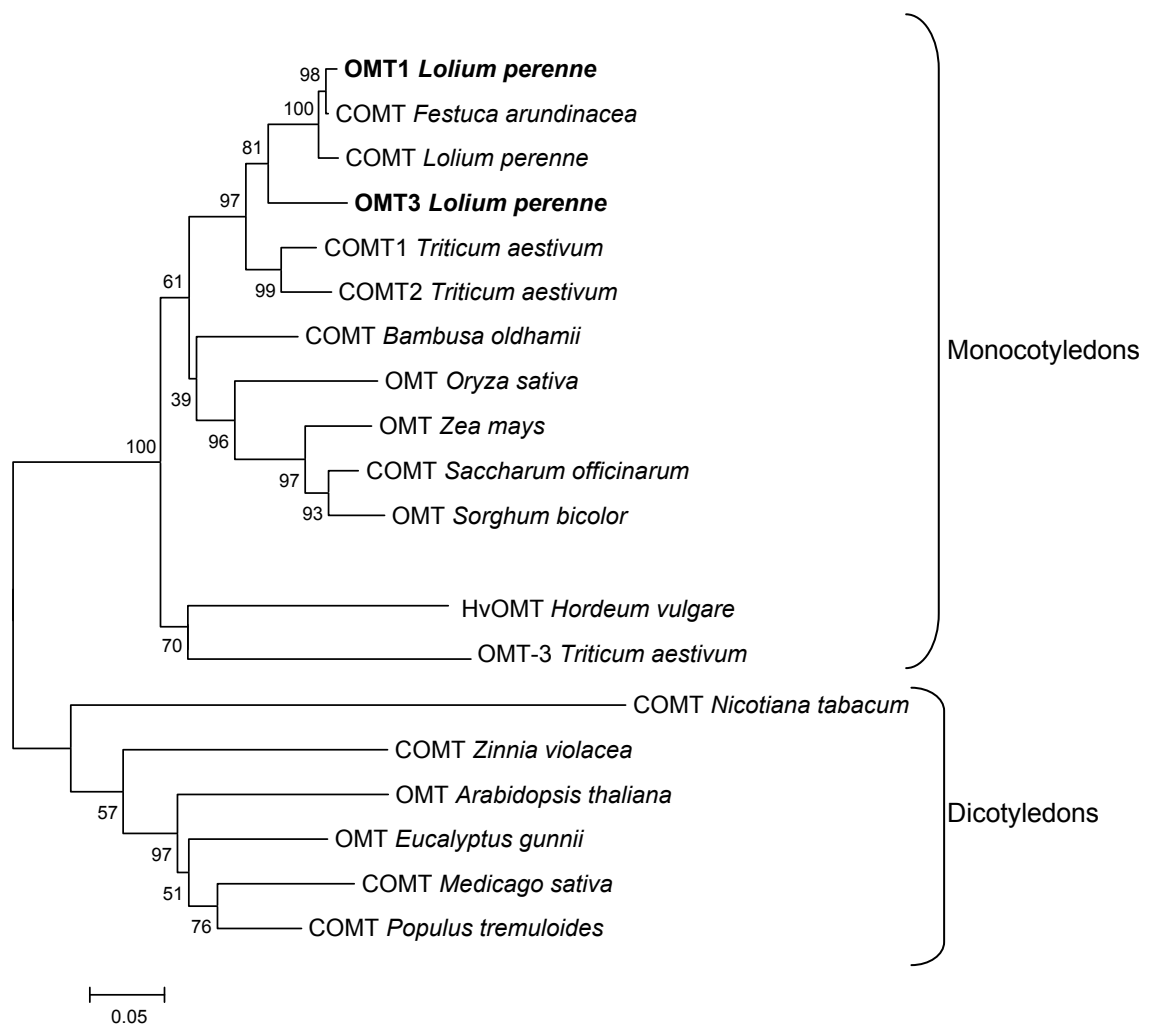

**Supplementary Figure 3.** Phylogenetic tree showing the relationships between the deduced amino acid sequences of plant caffeic acid O-methyltransferases. The Swissprot accession numbers are as follows: AAD10253, AAK68907.1, AAC18623, AAD10255, ABP63535.1, AAP23942.1, ABS18316.1, ABB90678.1, AAB03364.1, CAA13175.1, AAL57301.1, BAC54275.1, ABP93669.1, AAL91506.1, AAA86718.1, AAB96879.1, CAA52814.1, AAB46623.1 and AAB61731.1.

|         |   |                      |                                                              |               |     |     |     |     |  |
|---------|---|----------------------|--------------------------------------------------------------|---------------|-----|-----|-----|-----|--|
|         |   | *                    | 20                                                           | *             | 40  | *   | 60  | *   |  |
| Ms COMT | : | MGSTG-ETQITP         | THISDEEANLFAMQLASASVLPMLKSALELDLLEIIAK--AGPGAQISPIEIASQLP    | :             | 67  |     |     |     |  |
| At OMT  | : | MGSTA-ETQLTPVQVT     | DDEAALFAMQLASASVLPMLKSALELDLLEIMAK--NG--SPMSPTIEIASKLP       | :             | 65  |     |     |     |  |
| Pt COMT | : | MGSTG-ETQMTPTQV      | SDEEAHLFAMQLASASVLPMLKTAIELDLLEIMAK--AGPGAFLSTSEIASHLP       | :             | 67  |     |     |     |  |
| Ta COMT | : | MGSTAADM----         | AASADEEACMYALQLVSSSILPMTLKNKNAIELGLLETLV--AAGGKL-LTPAEVAAKLP | :             | 63  |     |     |     |  |
| Zm OMT  | : | MGSTAGDV----         | AAVVDEEACMYAMQLASSSILPMTLKNKNAIELGLLEVLQKEAGGKAALAPEEVVARM   | :             | 66  |     |     |     |  |
| Fa COMT | : | MGSTAADM----         | AASADEDACMFALQLASSSILPMTLKNKNAIELGLLEILV--AAGGKS-LTPTEVAAKLP | :             | 63  |     |     |     |  |
| Lp OMT1 | : | MGSTAADM----         | AASADEDACMFALQLASSSILPMTLKNKNAIELGLLEILV--AAGGKS-LTPTEVAAKLP | :             | 63  |     |     |     |  |
| Lp OMT3 | : | MGSTAAEI----         | AASADEEACLYALQLGSSSILPMTLKNKNTIELGLLETLM--AAGGKS-LTPTEVAAKLP | :             | 63  |     |     |     |  |
|         |   |                      |                                                              |               |     |     |     |     |  |
|         |   | 80                   | *                                                            | 100           | *   | 120 | *   | 140 |  |
| Ms COMT | : | TT--NPDAPV-MLDRMLRLL | LACYIILTCSV--RTQQDGKVVRLYGLATVAKYLVKNEDGVSISALNLMNQ          | :             | 132 |     |     |     |  |
| At OMT  | : | TK--NPEAPV-MLDRILRLL | TSYSVLTCSN--RKLSDGVERIYGLGPVCKYLTKNEDGVSIAALCLMNQ            | :             | 130 |     |     |     |  |
| Pt COMT | : | TK--NPDAPV-MLDRILRLL | SYSILTCSL--KDLDPDGKVERLYGLAPVCKFLTKNEDGVSISPLCLMNQ           | :             | 132 |     |     |     |  |
| Ta COMT | : | STA-NPAAAD-MVDRMLRLL | SYNVVSCTM--EEGKDGRLSRRYRAAPVCKFLTPNEDGVSMAALALMNQ            | :             | 129 |     |     |     |  |
| Zm OMT  | : | AAPSDFAAAAAMVDRMLRLL | SADYDVVRCQM--ED-RDGRYERRYSAAPVCKWLTLPNEDGVSMAALALMNQ         | :             | 133 |     |     |     |  |
| Fa COMT | : | SAA-NPEAPD-MVDRILRLL | SYNVVTCLV--EEGKDGRLSRSYGAPVCKFLTLPNEDGVSMAALALMNQ            | :             | 129 |     |     |     |  |
| Lp OMT1 | : | SAA-NPEAPD-MVDRILRLL | SYNVVTCLV--EEGKDGRLSRSYGAPVCKFLTLPNEDGVSMAALALMNQ            | :             | 129 |     |     |     |  |
| Lp OMT3 | : | CAAKNPEAPD-MVDRMLRLL | SYNVVSCLV--EEGTDGRLSRRYGAAPVCKFLTLPNEDGVSMAALALMNQ           | :             | 130 |     |     |     |  |
|         |   |                      |                                                              |               |     |     |     |     |  |
|         |   | *                    | 160                                                          | *             | 180 | *   | 200 | *   |  |
| Ms COMT | : | DKVLMESWYHLKDAVLDGGI | IPFNKAYGMTAFEYHGTDPRENFVNKMGMSDHSITITMKKIL-ETYTGFEGL         | :             | 201 |     |     |     |  |
| At OMT  | : | DKVLMESWYHLKDAILDGGI | IPFNKAYGMSAFEYHGTDPRENFVNNGMSNHSITITMKKIL-ETYKGFEG           | :             | 199 |     |     |     |  |
| Pt COMT | : | DKVLMESWYHLKDAILDGGI | IPFNKAYGMTAFEYHGTDPRENFVNKMGMSDHSITITMKKIL-ETYKGFEG          | :             | 201 |     |     |     |  |
| Ta COMT | : | DKVLMESWYHLKDAVLDGGI | IPFNKAYGMSAFEYHGTDPRENFVNEGMKNHSIIITKKLL-EVYKGFEG            | :             | 198 |     |     |     |  |
| Zm OMT  | : | DKVLMESWYHLKDAVLDGGI | IPFNKAYGMTAFEYHGTDPRENFVNEGMKNHSVIIITKKLL-DFYTGFEGL          | :             | 202 |     |     |     |  |
| Fa COMT | : | DKVLMESWYHLKDAVLDGGI | IPFNKAYGMSAFEYHGTDPRENFVNEGMKNHSIIITKKLL-ELYHGFEG            | :             | 198 |     |     |     |  |
| Lp OMT1 | : | DKVLMESWYHLKDAVLDGGI | IPFNKAYGMSAFEYHGTDPRENFVNEGMKNHSIIITKKLL-ELYHGFEG            | :             | 198 |     |     |     |  |
| Lp OMT3 | : | DKVLMESWYHLKDAVLDGGI | IPFNKAYGMSAFEYHGTDPRENFVNEAMKNNSIIITKKLL-QLYDGGQGL           | :             | 199 |     |     |     |  |
|         |   |                      |                                                              |               |     |     |     |     |  |
|         |   | 220                  | *                                                            | 240           | *   | 260 | *   | 280 |  |
| Ms COMT | : | KSLVDVGGGTGAVINTIV   | SKYPTIKGINFDLPHVIEDAPSYPGVEHVGGDMFVSVIPKA-DAVFMKWI           | CHD           | :   | 270 |     |     |  |
| At OMT  | : | TSLVDVGGGTICATLKMIV  | SKYPNLKGINFDLPHVIEDAPSHPGIEHVGGDMFVSVIPKG-DAIFM              | KWICH         | :   | 268 |     |     |  |
| Pt COMT | : | TSLVDVGGGTGAVNTIV    | SKYPSIKGINFDLPHVIEDAPSYPGVEHVGGDMFVSVIPKA-DAVFM              | KWICH         | :   | 270 |     |     |  |
| Ta COMT | : | GTIVDVGGGIVGATVGA    | ITAAYPKIKGINFDLPHVISEAQPFPGVTHVGGDMFQKVP                     | PSG-DAILMKWIL | HD  | :   | 267 |     |  |
| Zm OMT  | : | STLVDVGGGIVGATLHA    | ITSRPHISGVNFDLPHVISEAPFPFPGVRHVGGDMFASVPAG-DAILM             | KWIL          | HD  | :   | 271 |     |  |
| Fa COMT | : | GSLVDVGGGIVGATVA     | AAIAAHYPTIKGVNFDLPHVISEAPQFPVTHVGGDMFKEVPSG-DAILM            | KWIL          | HD  | :   | 267 |     |  |
| Lp OMT1 | : | GTLVDVGGGIVGATVA     | AAIAAHYPTIKGVNFDLPHVISEAPQFPVTHVGGDMFKEVPSG-DTILM            | KWIL          | HD  | :   | 267 |     |  |
| Lp OMT3 | : | GTLVDVGGGIVGATVA     | AATAHYPTIKGINFDLPHVISEAPFPVTHVGGDMFKKVP                      | LG-DAILMKWIL  | HD  | :   | 268 |     |  |
|         |   |                      |                                                              |               |     |     |     |     |  |
|         |   | *                    | 300                                                          | *             | 320 | *   | 340 | *   |  |
| Ms COMT | : | MSDEHCLKFLKNCYEALPDN | ---GKVIVAEICILPVAP-DSSLATKGVVHIDV-IMLAHNP                    | GGKERTQ       | KEF | :   | 335 |     |  |
| At OMT  | : | MSDEHCVKFLKNCYESLPED | ---GKVILAEICILPETP-DSSLSTKQVVHDC-IMLAHNP                     | GGKERT        | KEF | :   | 333 |     |  |
| Pt COMT | : | MSDAHCLKFLKNCYDALPEN | ---GKVILVEICILPVAP-DTSLATKGVVHIDV-IMLAHNP                    | GGKERT        | KEF | :   | 335 |     |  |
| Ta COMT | : | MSDEHCATLLKNCYDALPAH | ---GKVVLVEICILPVNP-EATPKAQGVFHVDM-IMLAHNP                    | GGRERY        | REF | :   | 332 |     |  |
| Zm OMT  | : | MSDAHCATLLKNCYDALPEN | ---GKVIVVEICVLPVNT-EATPKAQGVFHVDM-IMLAHNP                    | GGKERY        | REF | :   | 336 |     |  |
| Fa COMT | : | MSDQHCATLLKNCYDALPAH | ---GKVVLVEICILPVNP-EANPSSQGVFHVDM-IMLAHNP                    | GGRERY        | REF | :   | 332 |     |  |
| Lp OMT1 | : | MSDQHCATLLKNCYDALPAH | ---GKVVLVEICILPVNP-EANPSSQGVFHVDM-IMLAHNP                    | GGRERY        | REF | :   | 332 |     |  |
| Lp OMT3 | : | MSDQHCATLLKNCYDALPMH | ---GKVVLVEICILPVNP-EAKPSSQGVFHVDM-IMLAHNP                    | GGRERY        | REF | :   | 333 |     |  |
|         |   |                      |                                                              |               |     |     |     |     |  |
|         |   | 360                  | *                                                            | 380           |     |     |     |     |  |
| Ms COMT | : | EDLAKGAGFGFKVHCNAFN  | TYIMEFLKKV                                                   | :             | 365 |     |     |     |  |
| At OMT  | : | EALAKASGFKGKVVCD     | AFVGNLIELLKKL                                                | :             | 363 |     |     |     |  |
| Pt COMT | : | EGLAKGAGFGFEVMCCA    | FNTHVIEFRKKA                                                 | :             | 365 |     |     |     |  |
| Ta COMT | : | EALAKGAGFKAIKTTYI    | YANAWAIEFTK--                                                | :             | 360 |     |     |     |  |
| Zm OMT  | : | RELAKGAGFSGFKATYI    | YANAWAIEFIK--                                                | :             | 364 |     |     |     |  |
| Fa COMT | : | QALARGAGFTGVKSTYI    | YANAWAIEFTK--                                                | :             | 360 |     |     |     |  |
| Lp OMT1 | : | QALARGAGFTGVKSTYI    | YANAWAIEFTK--                                                | :             | 360 |     |     |     |  |
| Lp OMT3 | : | EALARGAGFAGFKSTYI    | YANAWAIEFTK--                                                | :             | 361 |     |     |     |  |

### Supplementary Figure 4. Multiple sequence alignment of caffeic acid O-methyltransferases from perennial ryegrass and other plant species.

Residues involved in SAM binding, catalytic activity and substrate specificity are highlighted in blue, red and yellow, according to structural analysis of Zubieta et al. (2002). Lp: *Lolium perenne*, Ms: *Medicago sativa*, At: *Arabidopsis thaliana*, Pt: *Populus tremuloides*, Ta: *Triticum aestivum*, Zm: *Zea mays*, Fa: *Festuca arundinacea*. The accession numbers are as follows. Swissprot AAB46623.1, AAB96879.1, AAB61731.1, ABP63535.1, AAB03364.1, AAK68907.1, AF033538 AF033540

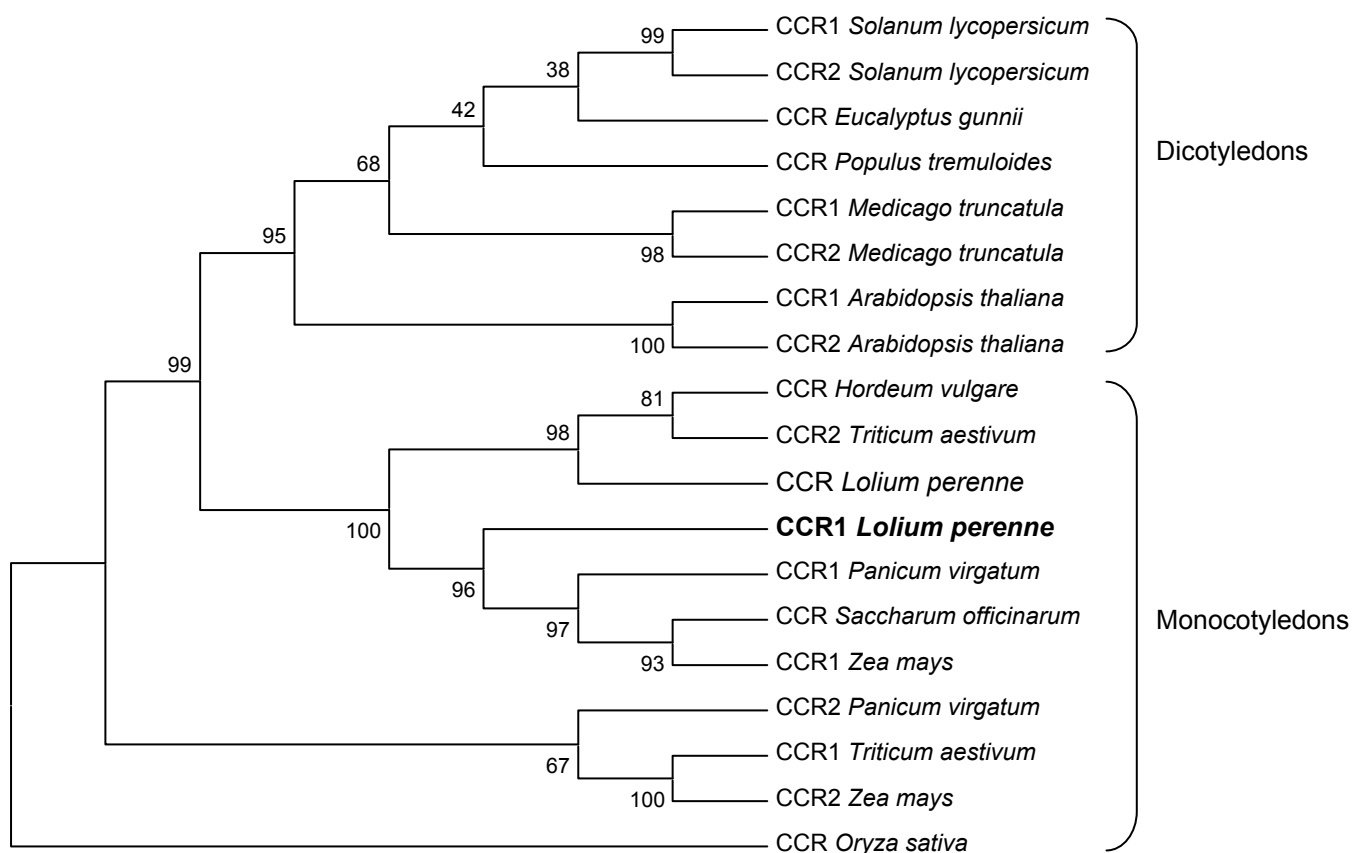

**Supplementary Figure 5.** Phylogenetic tree showing the relationships between the deduced amino acid sequences of plant cinnamoyl-CoA-reductases.

Genbank accession numbers are as follows: CAA13176.1, NP\_001105488.1, ACZ74580.1, AAL47182.1, AAG09817.1, AAX08107.1, AAN71760.1, AAG46037.1, NP\_178197.1, AAF43141.1, CAA56103.1, AAY41879.1, AAY41880.1, CAD21520.1, ACZ74585.1, NP\_001105715.1, ABE01883.1, Mt CCR1 (TC 128336), Mt CCR2 (TC 132256),

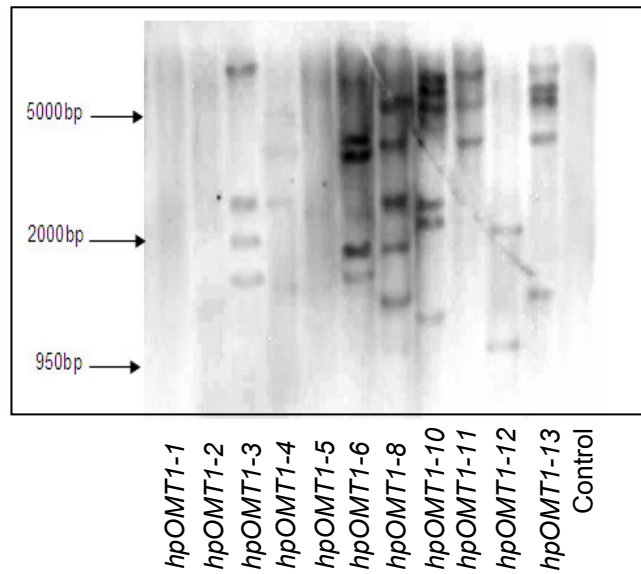

**Supplementary Figure 6.** Southern hybridization analysis of transgene copy number in perennial ryegrass plants containing an *hpOMT1* construct.

Genomic DNA was extracted from 11 transgenic lines and 1 wild type control plant, digested with *EcoRI* and hybridized to a probe that was complementary to the maize *Ubiquitin* promoter present in the transgene.

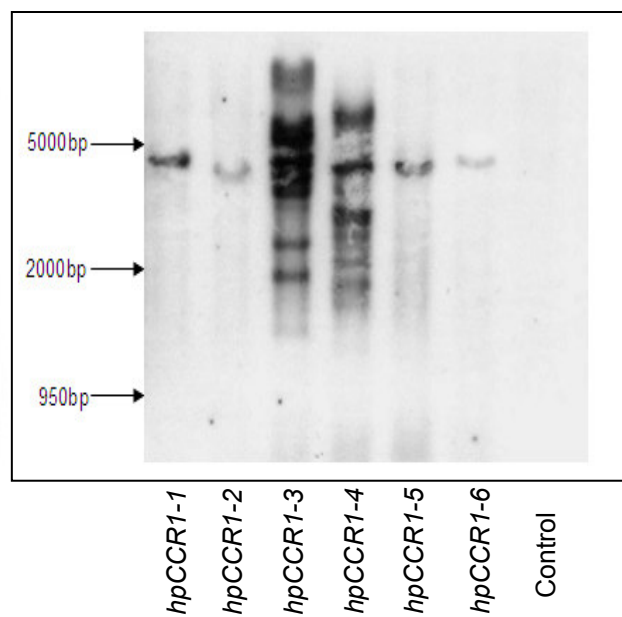

**Supplementary Figure 7.** Southern hybridization analysis of transgene copy number in perennial ryegrass plants containing an *hpCCR1* construct. Genomic DNA was extracted from 6 transgenic lines and 1 wild type control plant, digested with *EcoRI* and hybridized with a probe that was complementary to the maize *Ubiquitin* promoter present in the transgene cassette

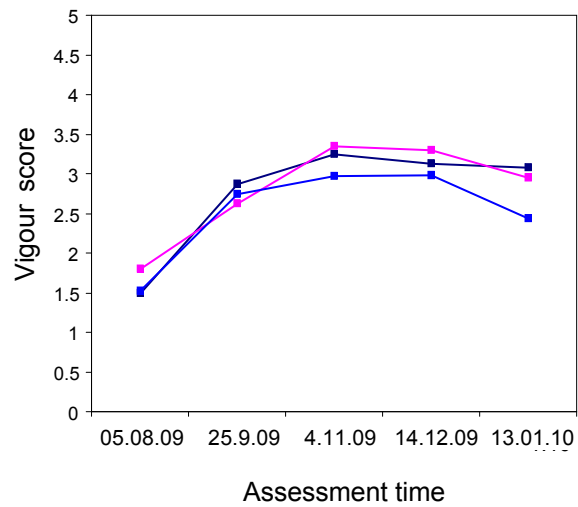

**Supplementary Figure 8.** Phenotypic analysis of the plants grown under field conditions.

Transgenic *hpCCR1-1* (blue line), *hpOMT1-3* (red line) and control plants (black line) were assessed for vigour growth (scores 1-5) under field condition from August 2009 till January 2010.



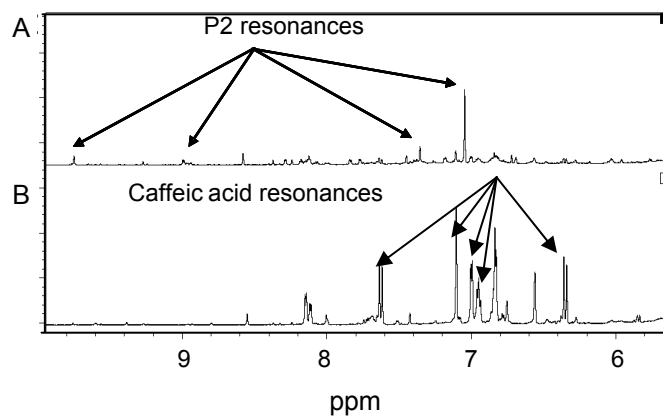

**Supplementary Figure 9.** NMR analysis of aqueous soluble metabolites from *hpCCR1-1* and control plants. Expansion of the aromatic region of the <sup>1</sup>H NMR spectrum (acquired in MeOD for maximum phenolic solubility).

A. Control plants

B. *hpCCR1-1* plants

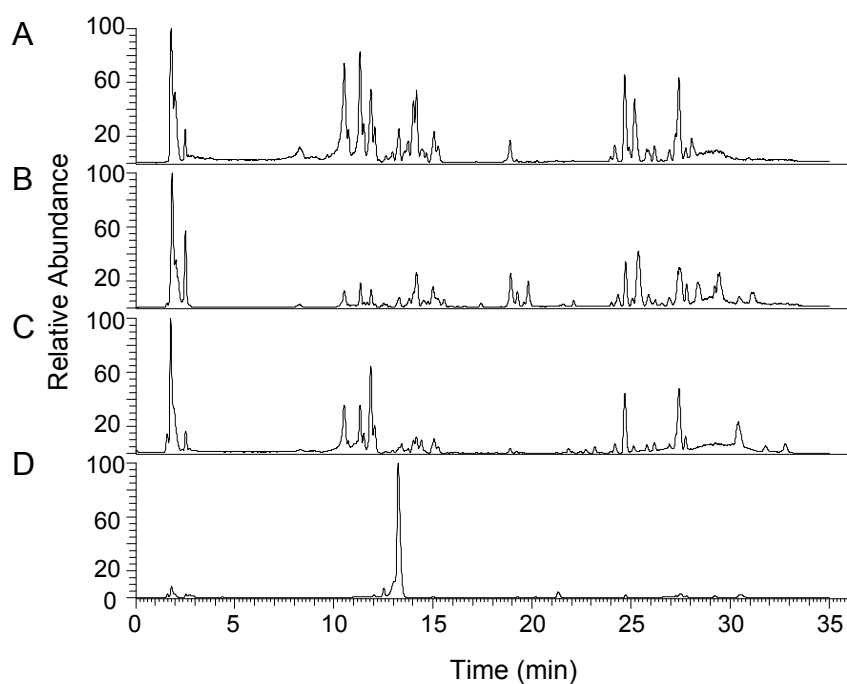

**Supplementary Figure 10.** LCMS chromatograms of a *hpCCR1-1* mutant compared to control in both positive and negative acquisition modes.

**(A)** *hpCCR1-1* ESI negative base peak chromatogram

**(B)** Control ESI negative base peak chromatogram

**(C)** *hpCCR1-1* ESI positive base peak chromatogram

**(D)** Control ESI positive base peak chromatogram

**Supplementary Table 1** Homology between members of COMT proteins from perennial ryegrass and tall fescue

|                | <b>Lp OMT1</b> | <b>Lp OMT3</b> | <b>La COMT</b> |
|----------------|----------------|----------------|----------------|
| <b>Lp OMT1</b> |                | 90%            | 98%            |
| <b>Lp OMT3</b> | 90%            |                | 90.3%          |

The Swissprot accession numbers are as follows:

Lp OMT1: AF033538

Lp OMT3: AF033540

La COMT: AAK68907

**Supplementary Table 2** Homology between members of CCR proteins from monocots

|                | <b>Lp CCR1</b> | <b>Lp CCR</b> | <b>Ta CCR1</b> | <b>Hv CCR</b> | <b>So CCR</b> | <b>Zm CCR1</b> | <b>Pv CCR1</b> |
|----------------|----------------|---------------|----------------|---------------|---------------|----------------|----------------|
| <b>Lp CCR1</b> |                | 75%           | 80%            | 80%           | 82%           | 85%            | 89%            |
| <b>Lp CCR</b>  | 75%            |               | 77%            | 78%           | 77%           | 77%            | 79%            |

The Swissprot accession numbers are as follows:

Lp CCR1: AAL47182

Lp CCR: AAG09817.1

Ta CCR1: ABE01883.1

Hv CCR: AAN71760.1

So CCR: CAA13176.1

Zm CCR1: NP\_001105488.1

Pv CCR1: ACZ74580

**Supplementary Table 3** List of primers

| Gene                          | Primer sequence (5'-3') |                                          |
|-------------------------------|-------------------------|------------------------------------------|
| <i>OMT1</i> (qRT-PCR)         | Forward                 | GGCCATCGAGTTCACCAAGTAG                   |
|                               | Reverse                 | GGCAGCAGCCAGCAAGAT                       |
| <i>OMT3</i> (qRT-PCR)         | Forward                 | TCTCTCGCTCATACTACCAAAAACA                |
|                               | Reverse                 | ATCTCTGCCTGTGTCTGCTTCTC                  |
| <i>CCR1</i> (qRT-PCR)         | Forward                 | GATGTCTGAACCAGAAGCTCCA                   |
|                               | Reverse                 | GCTAGGGTTTCCTTGTCCGC                     |
| <i>His</i> (qRT-PCR)          | Forward                 | TGCTTGCCCTTCAGGAGGCT                     |
|                               | Reverse                 | ATCCTCCTGGCAAGCTGAATGA                   |
| <i>GAPDH</i> (qRT-PCR)        | Forward                 | TGGTGCCAAGAAGGTCATCAT                    |
|                               | Reverse                 | GACCATCAACAGTCTTCTGG                     |
| <i>Tub</i> (qRT-PCR)          | Forward                 | AGTTGCCCCCAGTGATGGTA                     |
|                               | Reverse                 | GCCACGATACACAAACAAGCA                    |
| <i>CCR1</i> ( <i>hpCCR1</i> ) | Forward                 | CGGGATCCTTCAGGCCGGTGAGCC                 |
|                               | Reverse                 | CTAGCTTATTTGTAGAGATGGTGCTTAAGG           |
| <i>OMT1</i> ( <i>hpOMT1</i> ) | Forward                 | GGGGACAAGTTTGTACAAAAAAGCAGGCTTCATGGGCTCC |
|                               | Reverse                 | GGGGACCACTTTGTACAAGAAAGCTGGGTCCTTGGTGC   |
| <i>hph</i> (probe)            | Forward                 | CGCATAACAGCGGTCATTGACTGGAGC              |
|                               | Reverse                 | GCTGGGGCGTCGGTTTCCACTATCGG               |
| <i>Ubi</i> (probe)            | Forward                 | CCAAGCGAAGCAGACGGCAC                     |
|                               | Reverse                 | GGACCGGAACGCCGATCTAG                     |

**Supplemental Methods.** Phylogenetic analysis.

Plant sequences shown in Supplemental Data Set 1 and Supplemental Data Set 2 were aligned using ClustalW program. The phylogenetic tree was constructed using the neighbor-joining method in the MEGA4.0.2 package (Tamura et al. 2007)

**Supplemental Reference.**

**Tamura, K., Dudley, J., Nei, M., and Kumar, S.** (2007). MEGA4: Molecular Evolutionary Genetics Analysis (MEGA) software version 4.0. *Mol Biol Evol* **24**, 1596-1599.
